# Supplementary material for: Direct binding of TFEα opens DNA binding cleft of RNA polymerase
Source: PubMed Central journal article supplement (PMC7704642; doi:10.1038/s41467-020-19998-x), 2020-11-30
Supplement: 41467_2020_19998_MOESM3_ESM.pdf [file 41467_2020_19998_MOESM3_ESM.pdf]

## **Description of Additional Supplementary Files**

### **Supplementary Movie 1: Conformational changes of *Tko* RNAP**

This video shows conformational changes in *Tko* RNAP that occur during formation of the binary complex (from the apo-form RNAP to RNAP-TFE $\alpha$  complex) and the ternary complex (from the binary to RNAP-TFE $\alpha$ -DNA complex). The movie is related to Fig. 2.

### **Supplementary Movie 2: PIC and open complex formations**

This video shows the PIC and open complex formations in the archaeal transcription system in the presence of TFE $\alpha$ .
